# Supplementary material
Source: PubMed Central journal article supplement (PMC7512164)
Supplement: JCM.00848-20-s0001.pdf [file JCM.00848-20-s0001.pdf]

1 **Supplemental Material**

2 **TABLE S1. qPCR technical performance.**

|                                          | <b>qPCR technical performance</b> |                            |
|------------------------------------------|-----------------------------------|----------------------------|
|                                          | <b>IP-10 (target)</b>             | <b>β-actin (reference)</b> |
| <b>Measurements (n)</b>                  | 42                                | 42                         |
| <b>Linear dynamic range</b>              | 22.70 - 35.23                     | 19.75 - 32.84              |
| <b>Reproducibility</b>                   |                                   |                            |
| <b>Lower LOD (SD)</b>                    | 22.70 (± 0.18)                    | 19.75 (± 0.33)             |
| <b>Upper LOD (SD)</b>                    | 35.23 (± 0.32)                    | 32.84 (± 0.50)             |
| <b>Average PCR efficiency (SD)</b>       | 1.08 (0.04)                       | 0.99 (0.05)                |
| <b>γ-intercept</b>                       | 19.87 ± 0.3654                    | 16.83 ± 0.7339             |
| <b>Slope</b>                             | -3.139 ± 0.1102                   | -3.355 ± 0.2213            |
| <b>r<sup>2</sup> calibration curve</b>   | 1.00                              | 0.99                       |
| <b>Repeatability</b>                     |                                   |                            |
| <b>Measurements (n)</b>                  | 564                               | 564                        |
| <b>SD&lt;0.5:n/n<sub>total</sub> (%)</b> | 13 (2.3%)                         | 4 (0.7%)                   |

3

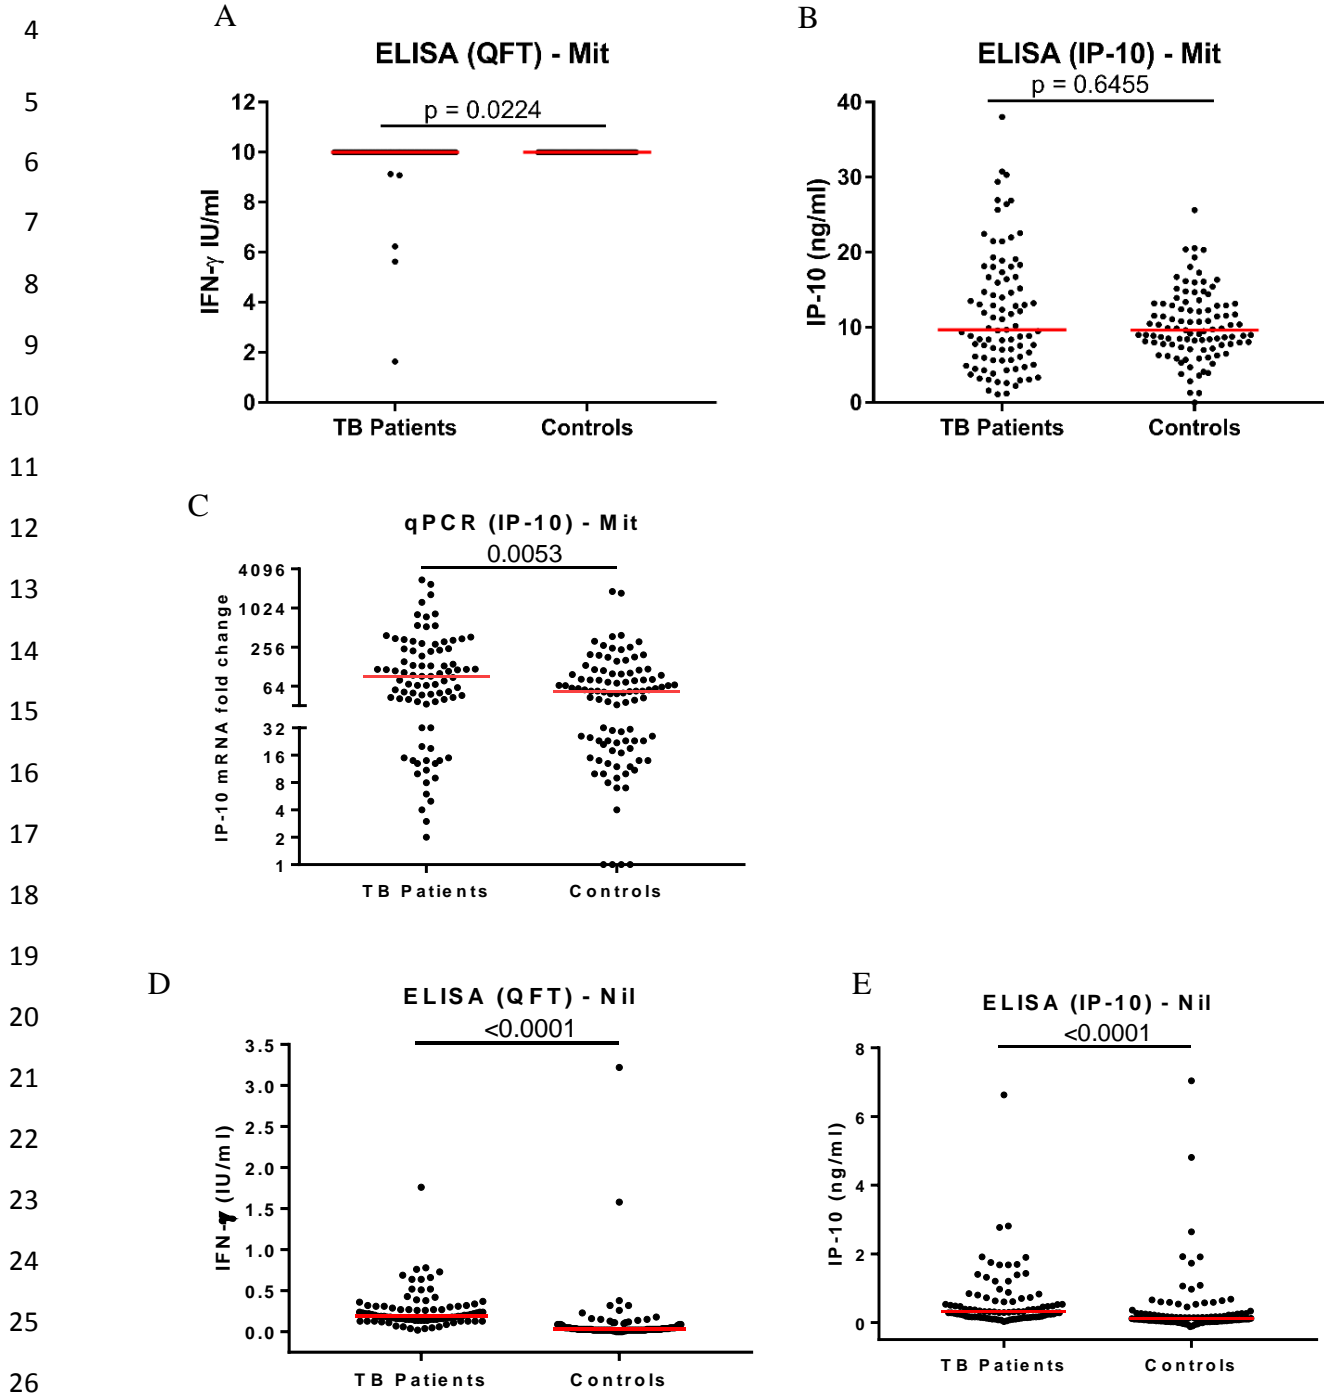

27 **FIG S1. Nil and Mitogen responses of TB patients and healthy controls.** IFN- $\gamma$  (A) and IP-10 (B)  
 28 protein plasma levels of the QFT Mitogen. IP-10 mRNA expression level (C) of the QFT Mitogen.  
 29 IFN- $\gamma$  (D) and IP-10 (E) protein plasma levels of the QFT Nil. Red lines indicate the median.

30

31  
32  
33  
34  
35  
36  
37  
38  
39  
40  
41  
42  
43  
44  
45  
46  
47  
48  
49  
50  
51  
52

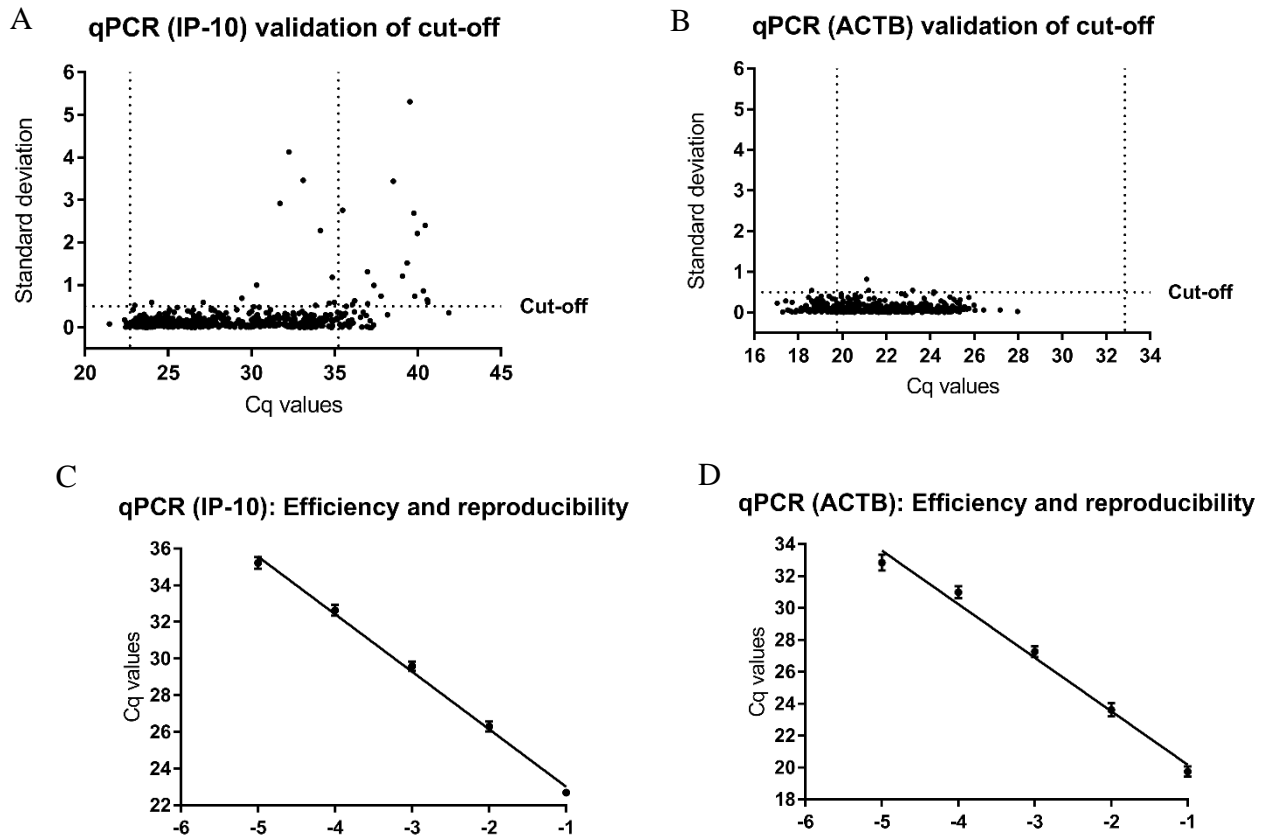

**FIG S2. Technical performance of the IP-10 RT-qPCR assay.** Linear range of the target IP-10 (A) and the reference  $\beta$ -Actin (ACTB) (B) genes. Standard deviation of duplicate measurements of TB patients samples (n=89) and healthy controls (n=99) for each QFT tube (total n=564) are plotted against measured Cq-values. Vertical lines represent the measured linear range according to the standard curve. Horizontal line represent cut-off at 0.5 Cq. Efficiency and reproducibility for target IP-10 (C) and reference  $\beta$ -Actin (D) genes. Standard curve is measured in duplicates in 42 individuals runs. Median of each measurement is plotted on the graph. Bars represent standard deviation.

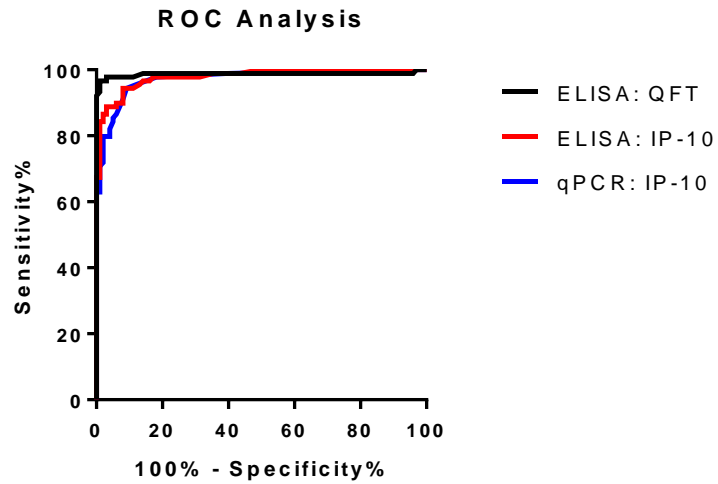

**FIG S3. ROC curve analysis comparing the three assays; QFT (ELISA), IP-10 (ELISA), IP-10 (RT-qPCR).** The analysis included all 89 TB patient and all 99 healthy control samples. The area under the curve (AUC) reflects the diagnostic potential of the individual assays. AUC for QFT (ELISA) 0.99 (95% CI 0.97-1.01), AUC for IP-10 (ELISA) 0.98 (95% CI 0.96-1.00) and AUC for IP-10 (RT-qPCR) 0.97 (95% CI 0.95-0.99).
